# Supplementary material
Source: PubMed Central journal article supplement (PMC3537871)
Supplement: NIHMS416558-supplement-125_2012_2753_MOESM1_ESM.pdf [file NIHMS416558-supplement-125_2012_2753_MOESM1_ESM.pdf]

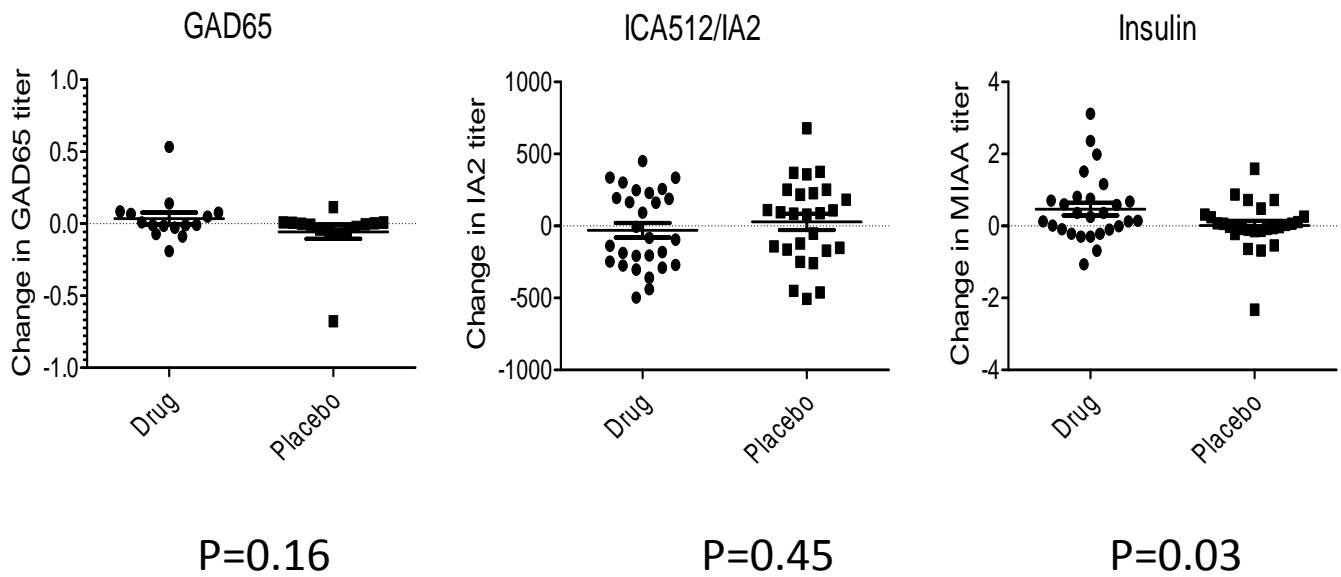

Supplementary Figure 1: Changes in autoantibody titers in drug and placebo treated subjects: The change of the log transformed antibody titers between baseline and month 12 for each individual is shown. The differences in the anti-GAD65 and anti-ICA512 or IA-2 antibodies were not statistically significant. There was a modest increase (\* $p < 0.05$ , drug vs placebo) in the anti-insulin antibody titers in the drug treated group.
