# Supplementary material
Source: PubMed Central journal article supplement (PMC3537871)
Supplement: NIHMS416558-supplement-125_2012_2753_MOESM2_ESM.pdf [file NIHMS416558-supplement-125_2012_2753_MOESM2_ESM.pdf]

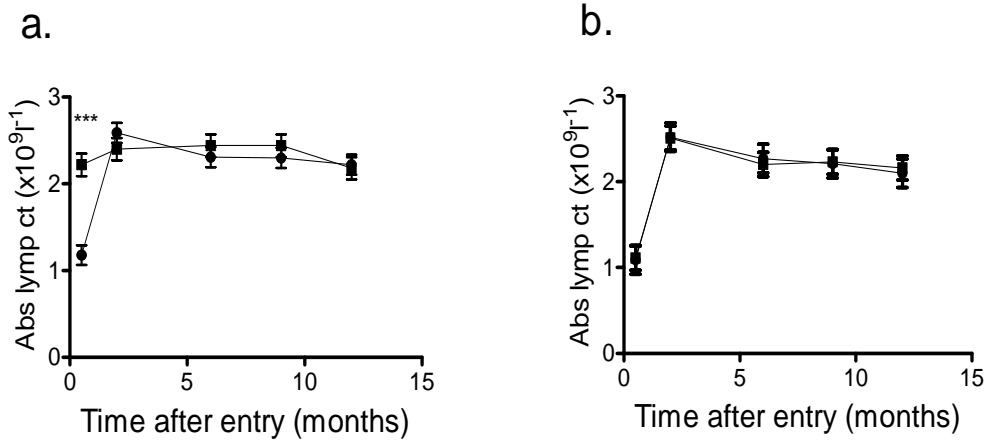

Supplementary Figure 2: Lymphocyte counts in drug and placebo treated subjects, responders and non-responders. The absolute numbers of circulating lymphocytes, corrected for baseline are shown (mean $\pm$ SEM) in the a: teplizumab (circles, n=31) and placebo (squares, n=27) treated subjects and (b) the teplizumab treated responders (circles, n=13) and non-responders (squares, n=18).
